## **The Status and Risk Factors of COVID-19 Related Suicides in Bangladesh**

Sadia Noosrat Boshra<sup>a,b</sup>, Mohammad Mohiminul Islam<sup>c\*</sup>

<sup>a</sup>Pharmaceutical professional based on Mohammadpur, Dhaka-1207, Bangladesh

<sup>b</sup>Registered Pharmacist, Pharmacy Council of Bangladesh, Dhaka-1000, Bangladesh

<sup>c</sup>Department of Chemistry and Biochemistry, University of Wisconsin-Milwaukee, Milwaukee, Wisconsin-53211, USA

### **\*Corresponding Author**

#### **Mohammad Mohiminul Islam**

Department of Chemistry and Biochemistry, University of Wisconsin-Milwaukee, Milwaukee, Wisconsin-53211, USA. E-mail: islam7@uwm.edu; cell phone: +1 (414) 269-7222

## **Abstract**

In addition to physical health, the COVID-19 pandemic has affected the global economy and mental health significantly. The economic and social consequence has sparked many psychological mediators. In severe cases, they led to suicidal behavior in individuals like as seen in the 1918-1919 flu pandemic and in the 2003 severe acute respiratory syndrome (SARS) epidemic. Previously, a few articles have been published with regard to COVID-19 suicides in Bangladesh. However, all these articles talked about sporadic cases of suicides with no clear picture of the holistic overview of suicides in Bangladesh. Herein, we looked into all COVID-19 suicide cases from March 01, 2020, to July 31, 2020, as reported in Bangladeshi media. Our study also reports the risk factors contributing to suicidal incidents. Moreover, we also identified the impact of gender, profession, and COVID-19 diagnosis status on committing suicide. This study will shed light on the topic with a clear understanding of the causalities influencing individuals to suicide. Furthermore, it will help the policymakers to take necessary actions to prevent any further suicides.

## 1. Introduction

The global pandemic, COVID-19 has brought in a dramatic change to our occupational and social behavior such as social distancing, quarantining, staying in isolation, and temporary or permanent shutdown of business ventures. It has disrupted the global economic homeostasis and placed a vast group of population into unemployment and poverty (Kawohl and Nordt, 2020). In addition to economic and physical health impact, the pandemic has also shaken the mental health and for many, it is leading to suicidal behavior, like as seen in the 1918-1919 flu pandemic and in the 2003 severe acute respiratory syndrome (SARS) epidemic (Gunnell et al., 2020). Consequently, it is imperative to monitor the general population's suicidal behavior in response to the COVID-19 pandemic.

Previously a few COVID-19 suicide cases were reported from Bangladesh (Bhuiyan et al., 2020; Mamun and Griffiths, 2020; Mamun et al., 2020). However, no holistic picture of the status of COVID-19 related suicidal incidents is found. Therefore, we attempted to document all the COVID-19 related suicide cases published in Bangladeshi press reports in order to better understand the risk factors, risk groups and imply possible actionable measures to aid preventing any future suicidal instances.

## 2. Methods

Given that there is no national suicide surveillance system or database available, we used online search engines (Google and Bing) to collect retrospective data published in online news portals in Bangladeshi press between March 01, 2020, and July 31, 2020. Similar methods of data collection were used previously in Bangladeshi setting (Mamun et al., 2020b; Arafat et al., 2018). The keywords used for search are the Bangla language words for suicide (“Attohotma”), corona in Bangladesh (“Bangladeshe corona”), COVID-19 in Bangladesh (“Bangladeshe COVID-19”), and “lockdown”. Both authors searched independently, search results were combined, duplications were removed and suicide cases (N=32) that relate to COVID-19 were included in this study.

## 3. Results

We identified 32 confirmed COVID-19 suicide cases reported by Bangladeshi press media. The first incident of COVID-19 related suicide occurred on March 23, 2020. Among the 32 victims, 21 were males and 11 were females. The median age of the victims was 35.5 years with a range of 10 to 58 years. The principal method of committing suicide was hanging (N=23), followed by consuming poison/pesticide (N=5), falling from a height (N=3), and setting fire on oneself (N=1). In most of the cases, multiple factors contributed to committing suicide. In some cases, one risk factor led to another (e.g. unemployment led to family disputes). The motivations behind the suicidal incidents were lockdown related unemployment, fear, xenophobia, depression, social stigma, family dispute, hunger, poverty, debt, and parental insult/dispute. Only one of the 32 victims were identified as a politician holding a public office, two were government service holder, seven did not report any profession and the rest (N=22) were non-government professional. The majority of them lost job due to COVID-19 or were day-earner and unable to go to work due to COVID-19 related lock-down. Only three of the victims were COVID-19 patients, one recovered from COVID-19 before committing suicide and the rest (N=28) were not diagnosed with COVID-19. The details of the 32 cases are included in table 1.

## 4. Discussion

In this study, we looked at different risk factors (i.e. gender, age, occupation, diagnosis with COVID-19 and suicidal reasons) in order to understand the determinants leading to suicide. Given that this is the first comprehensive study on COVID-19 suicides in Bangladeshi setting, hence, no comparison can be made to any previous study in terms of risk factors for COVID-19 suicides. Therefore, the present study provides substantial information about what shaping the behaviors into committing suicide during the pandemic.

In our finding, the first case of COVID-19 related suicide due to fear occurred on March 23, 2020, in contrast to what reported previously (Mamun and Griffiths, 2020). The highest number of suicides happened in June (N=11); likewise, the highest number of COVID-19 cases were also detected in the same month. The present study also found that males were the more vulnerable group compared to the females. Although suicide is more common in males compared to females globally, a report from Arafat, 2019 identified the opposite in Bangladesh both in the ratio of committed suicides and suicidal attempts. Therefore, it is noteworthy that COVID-19 related suicides are affecting the males more compared to females. This can be attributed to the fact that males are the principal bread earners in the majority of the Bangladeshi society and the economic impact has affected this group massively.

The primary three causes of suicide are COVID-19 related unemployment (N=16), depression (N=9), and family dispute (N=8). The other causes include are fear (N=6), hunger (N=4), poverty (N=3), debt (N=3), parental abuse (N=2), xenophobia (N=1), social stigma (N=1), parental dispute (N=1), and lack of access to treatment (N=1). Except for fear and xenophobia, all other factors in the majority of the cases were somewhat related to victim's economic status and purchasing power. Like many other states, Bangladesh went on nationwide lock-down two-weeks after the first confirmed case (March 8, 2020). The 66 days lockdown certainly affected the low-income people, particularly those who live on a day to day incomes with no savings. During the lockdown offices were closed, public transportation was shut, and gatherings were suspended (Siam et al., 2020). In consequence, many businesses temporarily or permanently got closed, leaving a lot of people unemployed. Given that, the government employees were protected economically, there is only two cases in this group of service holders.

Our study also found that the majority of the victims were not infected with the coronavirus SARS-CoV-2 indicating that the affiliated factors weighted more compared to getting infected with the virus. We also found that hanging was the most common form of suicide, similar to what reported previously in the Bangladeshi population (Arafat et al., 2018).

## **5. Conclusion**

Provided that any suicide is unfortunate, unwanted and is preventable; therefore, we suggest for expanded use of digital platforms like television and FM radios to educate the mass people on mental help access points and to prevent any further suicide. In addition to the current effort, we recommend for strong engagement of the local government and the law enforcement agencies with the people at the grassroots level to prevent the grooming and spreading of fake rumors, fake news, and eventually to lessen the prejudice and fear about COVID-19. Since unemployment and related poverty is the major cause of COVID-19 related suicide, the government should make sure no individual is left to hunger; therefore, should increase and lengthen the current relief program. Additionally, we also suggest performing a nationwide survey on knowledge, attitude, practices (KAP) among the village and unprivileged people to assess the level of their understanding of the new virus which in turn would help to construct proper actionable measures to minimize their sufferings associated with COVID-19.

### **Role of the funding source**

This research did not receive any specific grant from funding agencies in the public, commercial, or not-for-profit sectors.

### **Conflict of interest**

None to declare.

### **Compliance with ethical standard**

There was no conflict of interest in relation to present work. Informed consent is non-applicable to this work.

## Author agreement

All authors read the final manuscript and approved it.

## Acknowledgements

None

## References

- Arafat, S.M.Y., 2019. Females are dying more than males by suicide in Bangladesh. *Asian J. Psychiatr.* <https://doi.org/10.1016/j.ajp.2018.10.014>
- Arafat, S.M.Y., Mali, B., Akter, H., 2018. Demography and risk factors of suicidal behavior in Bangladesh: A retrospective online news content analysis. *Asian J. Psychiatr.* <https://doi.org/10.1016/j.ajp.2018.07.008>
- Bhuiyan, A.K.M.I., Sakib, N., Pakpour, A.H., Griffiths, M.D., Mamun, M.A., 2020. COVID-19-Related Suicides in Bangladesh Due to Lockdown and Economic Factors: Case Study Evidence from Media Reports. *Int. J. Ment. Health Addict.* <https://doi.org/10.1007/s11469-020-00307-y>
- Gunnell, D., Appleby, L., Arensman, E., Hawton, K., John, A., Kapur, N., Khan, M., O'Connor, R.C., Pirkis, J., Caine, E.D., Chan, L.F., Chang, S., Sen, Chen, Y.Y., Christensen, H., Dandona, R., Eddleston, M., Erlangsen, A., Harkavy-Friedman, J., Kirtley, O.J., Knipe, D., Konradsen, F., Liu, S., McManus, S., Mehlum, L., Miller, M., Moran, P., Morrissey, J., Moutier, C., Niederkrotenthaler, T., Nordentoft, M., O'Neill, S., Page, A., Phillips, M.R., Platt, S., Pompili, M., Qin, P., Rezaeian, M., Silverman, M., Sinyor, M., Stack, S., Townsend, E., Turecki, G., Vijayakumar, L., Yip, P.S., 2020. Suicide risk and prevention during the COVID-19 pandemic. *The Lancet Psychiatry.* [https://doi.org/10.1016/S2215-0366\(20\)30171-1](https://doi.org/10.1016/S2215-0366(20)30171-1)
- Kawohl, W., Nordt, C., 2020. COVID-19, unemployment, and suicide. *The Lancet Psychiatry.* [https://doi.org/10.1016/S2215-0366\(20\)30141-3](https://doi.org/10.1016/S2215-0366(20)30141-3)
- Mamun, M.A., Chandrima, R.M., Griffiths, M.D., 2020a. Mother and Son Suicide Pact Due to COVID-19-Related Online Learning Issues in Bangladesh: An Unusual Case Report. *Int. J. Ment. Health Addict.* <https://doi.org/10.1007/s11469-020-00362-5>
- Mamun, M.A., Griffiths, M.D., 2020. First COVID-19 suicide case in Bangladesh due to fear of COVID-19 and xenophobia: Possible suicide prevention strategies. *Asian J. Psychiatr.* <https://doi.org/10.1016/j.ajp.2020.102073>
- Mamun, M.A., Misti, J.M., Griffiths, M.D., 2020b. Suicide of Bangladeshi medical students: Risk factor trends based on Bangladeshi press reports. *Asian J. Psychiatr.* <https://doi.org/10.1016/j.ajp.2019.101905>
- Siam, M.H.B., Hasan, M.M., Raheem, E., Khan, M.H. rahaman, Siddiquee, M.H., Hossain, M.S., 2020. Insights into the first wave of the COVID-19 pandemic in Bangladesh: Lessons learned from a high-risk country. *medRxiv* 2020.08.05.20168674. <https://doi.org/10.1101/2020.08.05.20168674>

Table 1: COVID-19 suicide cases reported in Bangladeshi press from March 01, 2020 to July 31, 2020

| Month of Suicide | Gender of Victim | Age group | Type of profession | Diagnosed with COVID-19 | Method of Suicide       | Reason for Suicide                                                   |
|------------------|------------------|-----------|--------------------|-------------------------|-------------------------|----------------------------------------------------------------------|
| March, 2020      | M                | 30-39     | Non-governmental   | No                      | Hanging                 | Fear                                                                 |
| March, 2020      | M                | 30-39     | NR                 | No                      | Hanging                 | Fear, xenophobia                                                     |
| April, 2020      | F                | 40-49     | Non-governmental   | No                      | Hanging                 | Hunger, victim's husband unemployed due to COVID-19, family dispute  |
| April, 2020      | M                | 30-39     | Non-governmental   | No                      | Hanging                 | Hunger, unemployment due to COVID-19                                 |
| April, 2020      | F                | 10-19     | NR                 | No                      | Hanging                 | Hunger, parental abuse, victim's parent unemployed due to COVID-19   |
| April, 2020      | M                | 20-29     | Non-governmental   | No                      | Hanging                 | Unemployment due to COVID-19, family dispute, depression             |
| April, 2020      | M                | 30-39     | Non-governmental   | No                      | Hanging                 | Hunger, Unemployment due to COVID-19, family dispute                 |
| April, 2020      | M                | 50-59     | NR                 | No                      | Hanging                 | Fear                                                                 |
| April, 2020      | M                | 30-39     | Non-governmental   | No                      | Hanging                 | Unemployment due to COVID-19, poverty                                |
| April, 2020      | F                | 20-29     | NR                 | No                      | Hanging                 | Poverty, victim's husband unemployed due to COVID-19                 |
| April, 2020      | M                | 50-59     | Politician         | No                      | Hanging                 | Social stigma                                                        |
| May, 2020        | M                | 30-39     | Governmental       | No                      | Falling from height     | Fear, depression                                                     |
| May, 2020        | F                | 10-19     | Non-governmental   | No                      | Hanging                 | Poverty, victim's husband unemployed due to COVID-19, family dispute |
| May, 2020        | F                | 40-49     | NR                 | No                      | Hanging                 | Unknown/treatment refusal                                            |
| May, 2020        | M                | 30-39     | Non-governmental   | No                      | Hanging                 | Unemployment due to COVID-19, poverty, debt                          |
| May, 2020        | F                | 10-19     | Non-governmental   | No                      | Setting fire on oneself | Depression                                                           |
| June, 2020       | F                | 20-29     | Non-governmental   | No                      | Hanging                 | Parental dispute due to COVID-19                                     |
| June, 2020       | M                | 30-39     | Non-governmental   | No                      | Falling from height     | Fear                                                                 |

|            |   |       |                  |                  |                       |                                                                      |
|------------|---|-------|------------------|------------------|-----------------------|----------------------------------------------------------------------|
| June, 2020 | M | 50-59 | Non-governmental | No               | Consuming poison      | Unemployment due to COVID-19                                         |
| June, 2020 | M | 20-29 | Non-governmental | No               | Consuming poison      | Family dispute                                                       |
| June, 2020 | F | 40-49 | NR               | No               | Consuming poison      | Family dispute                                                       |
| June, 2020 | M | 40-49 | Non-governmental | Yes              | Falling from a height | Fear                                                                 |
| June, 2020 | M | 10-19 | Non-governmental | No               | Consuming poison      | Parental abuse                                                       |
| June, 2020 | M | 30-39 | Non-governmental | No               | Hanging               | Unemployment due to COVID-19, depression                             |
| June, 2020 | M | 40-49 | Non-governmental | Yes              | Hanging               | Depression                                                           |
| June, 2020 | M | 20-29 | Non-governmental | No               | Hanging               | Unemployment due to COVID-19, family dispute                         |
| June, 2020 | F | 50-59 | NR               | No               | Hanging               | Lack of access to treatment, victim's son unemployed due to COVID-19 |
| July, 2020 | M | 40-49 | Non-governmental | No               | Consuming pesticide   | Unemployment due to COVID-19, depression                             |
| July, 2020 | M | 50-59 | Non-governmental | Yes              | Hanging               | Depression                                                           |
| July, 2020 | F | 40-49 | Non-governmental | No               | Hanging               | Unemployment due to COVID-19, family dispute                         |
| July, 2020 | M | 40-49 | Non-governmental | No               | Hanging               | Unemployment due to COVID-19, depression, debt                       |
| July, 2020 | F | 40-49 | Governmental     | Yes <sup>a</sup> | Hanging               | Debt, depression                                                     |

NR = not reported

<sup>a</sup>Recovered before the incident of suicide
